# Supplementary material for: The Effect of Metal Ions (Fe, Co, Ni, and Cu) on the Molecular-Structural, Protein Binding, and Cytotoxic Properties of Metal Pyridoxal-Thiosemicarbazone Complexes
Source: MDPI journal article supplement (doi:10.3390/ijms241511910), 2023-07-25
Supplement: s1 [file s1]

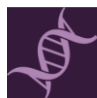

Supplementary Information

# The Effect of Metal Ions (Fe, Co, Ni, and Cu) on the Molecular-Structural, Protein Binding, and Cytotoxic Properties of Metal Pyridoxal-Thiosemicarbazone Complexes

Violeta Jevtovic <sup>1,\*</sup>, Asma K. Alshamari <sup>1</sup>, Dejan Milenković <sup>2</sup>, Jasmina Dimitrić Marković <sup>3</sup>, Zoran Marković <sup>2</sup> and Dušan Dimić <sup>3,\*</sup>

<sup>1</sup> Department of Chemistry, College of Science, University Ha'il, Ha'il 81451, Saudi Arabia; ak.alshamari@uoh.edu.sa

<sup>2</sup> Department of Science, Institute for Information Technologies, University of Kragujevac, Jovana Cvijića bb, 34000 Kragujevac, Serbia; dejanm@uni.kg.ac.rs (D.M.); zmarkovic@uni.kg.ac.rs (Z.M.)

<sup>3</sup> Faculty of Physical Chemistry, University of Belgrade, Studentski trg 12-16, 11000 Belgrade, Serbia; markovich@ffh.bg.ac.rs

\* Correspondence: v.jevtovic@uoh.edu.sa (V.J.) and ddimic@ffh.bg.ac.rs (D.D.)

**Citation:** Jevtovic, V.; Alshamari, A.K.; Milenković, D.; Dimitrić Marković, J.; Marković, Z.; Dimić, D. The Effect of Metal Ions (Fe, Co, Ni, and Cu) on the Molecular-Structural, Protein Binding, and Cytotoxic Properties of Metal Pyridoxal-Thiosemicarbazone Complexes. *Int. J. Mol. Sci.* **2023**, *24*, 1910. <https://doi.org/10.3390/ijms241511910>

Academic Editors: Claudia Riccardi, Marialuisa Piccolo

Received: 30 June 2023

Revised: 20 July 2023

Accepted: 21 July 2023

Published: 25 July 2023

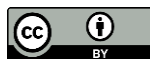

**Copyright:** © 2023 by the authors. Licensee MDPI, Basel, Switzerland. This article is an open access article distributed under the terms and conditions of the Creative Commons Attribution (CC BY) license (<https://creativecommons.org/licenses/by/4.0/>).

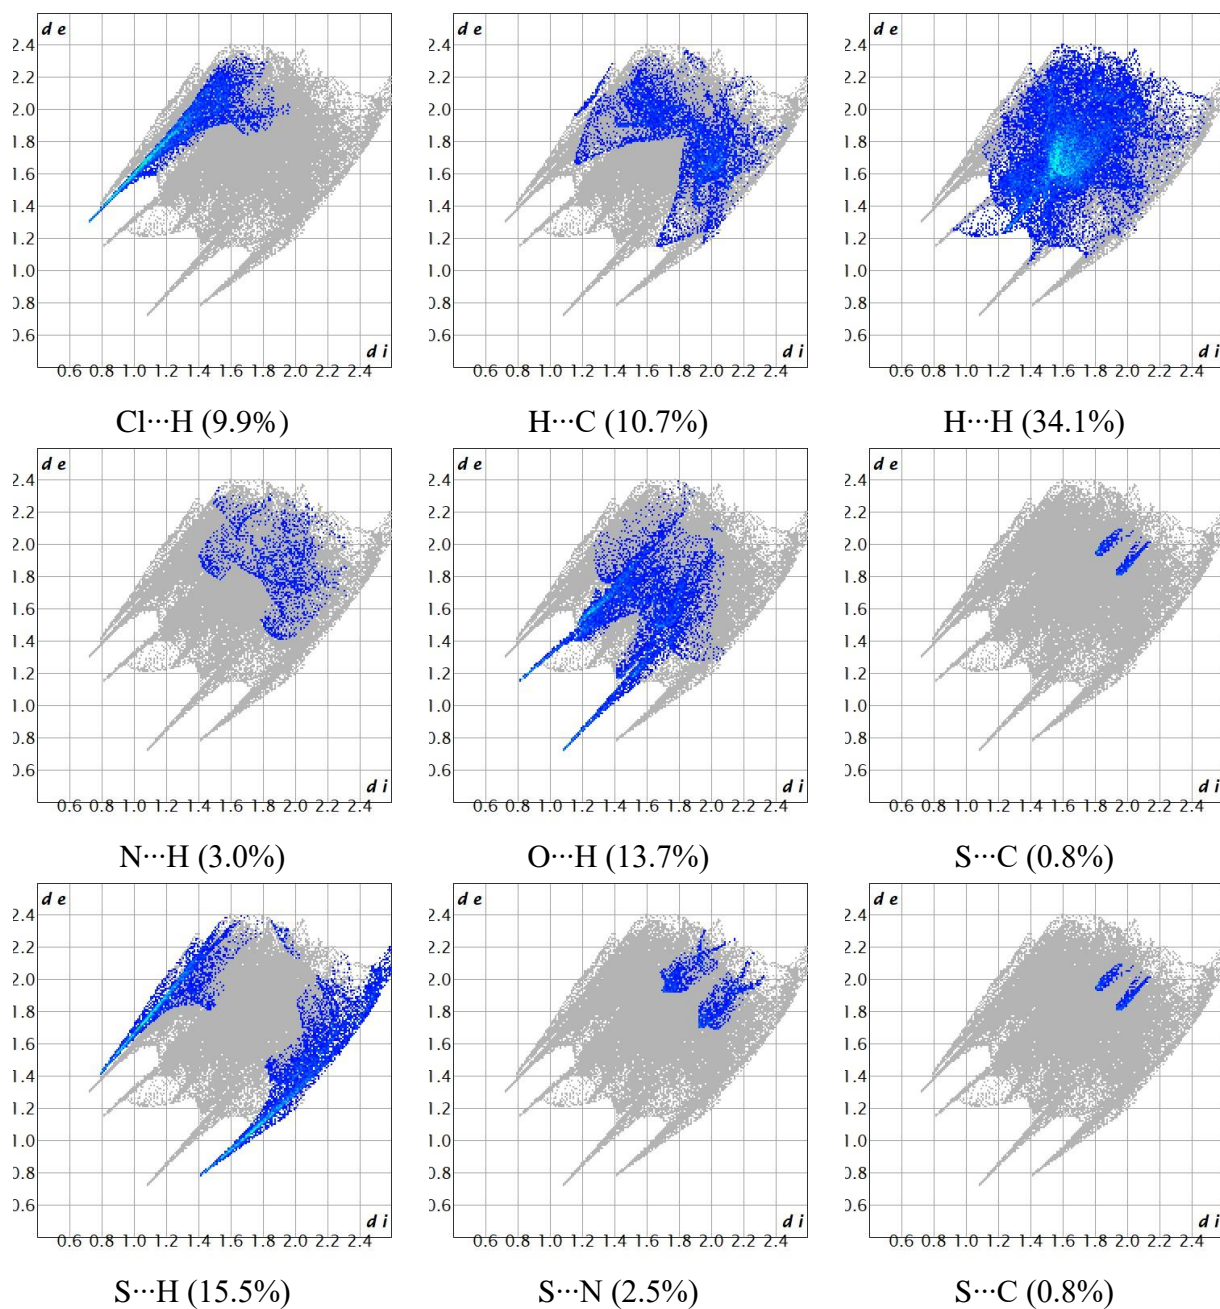

Figure S1. The fingerprint plots of the selected contacts within PLTSC structure

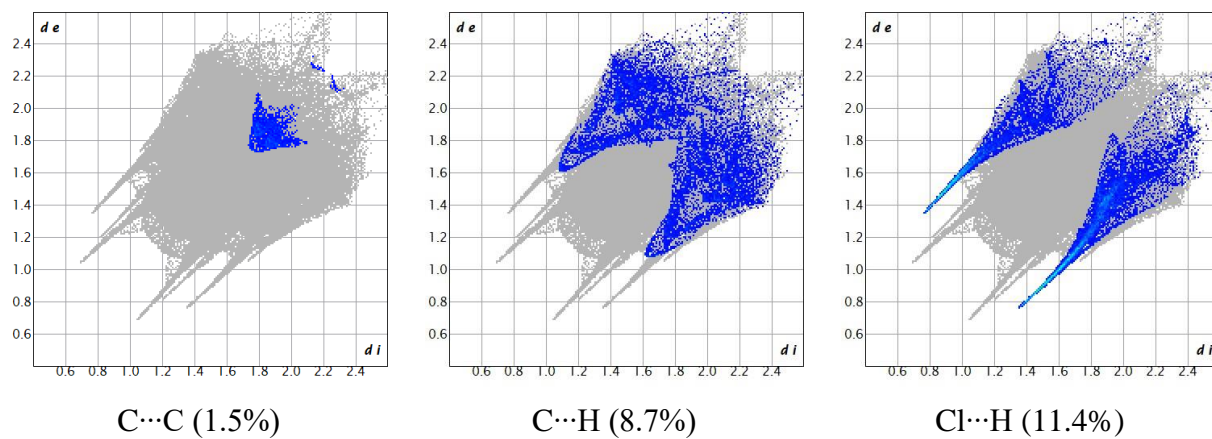

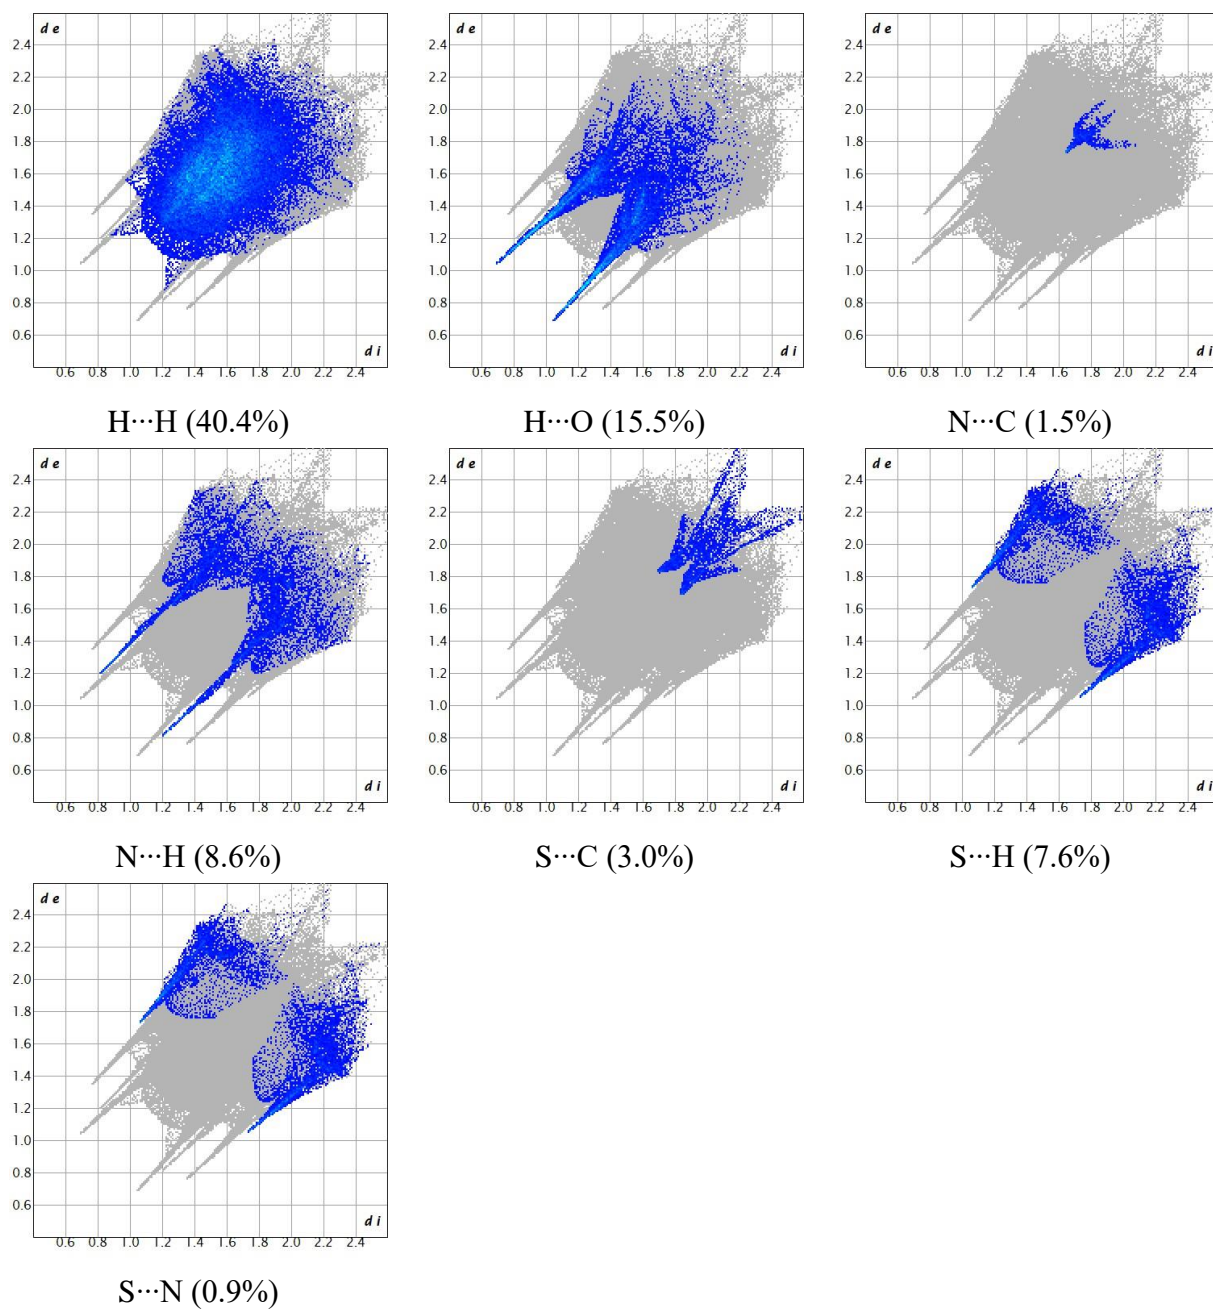

Figure S2. The fingerprint plots of the selected contacts within Co-PLTSC structure

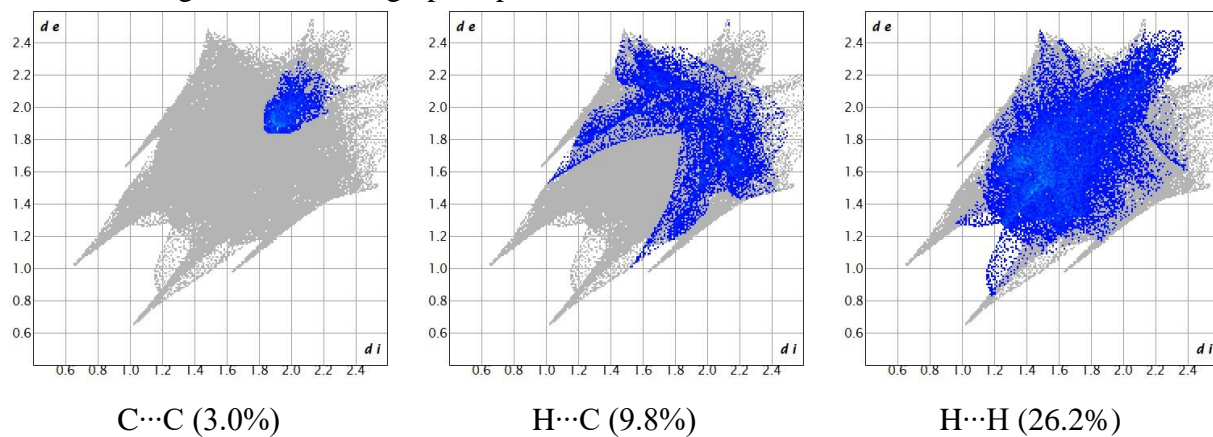

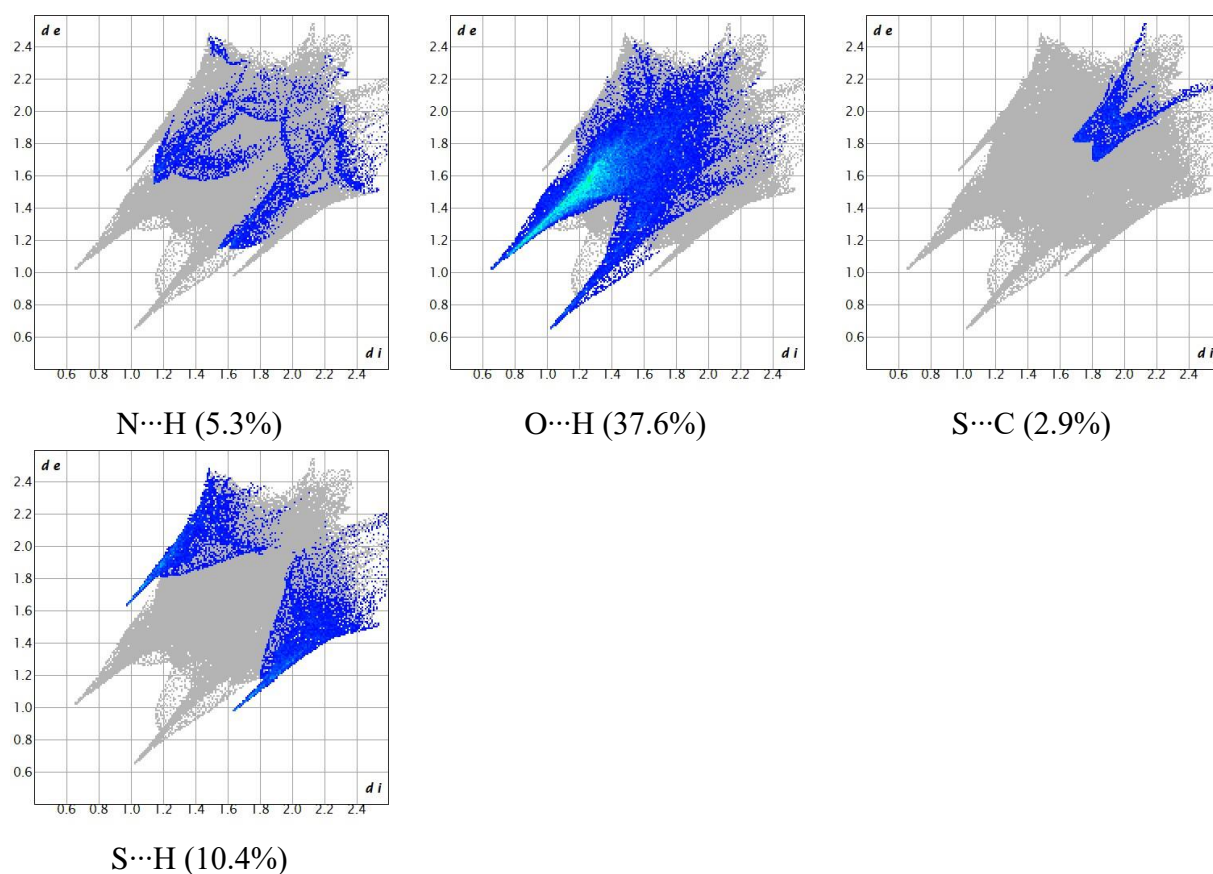

Figure S3. The fingerprint plots of the selected contacts within Co-PLTSC structure

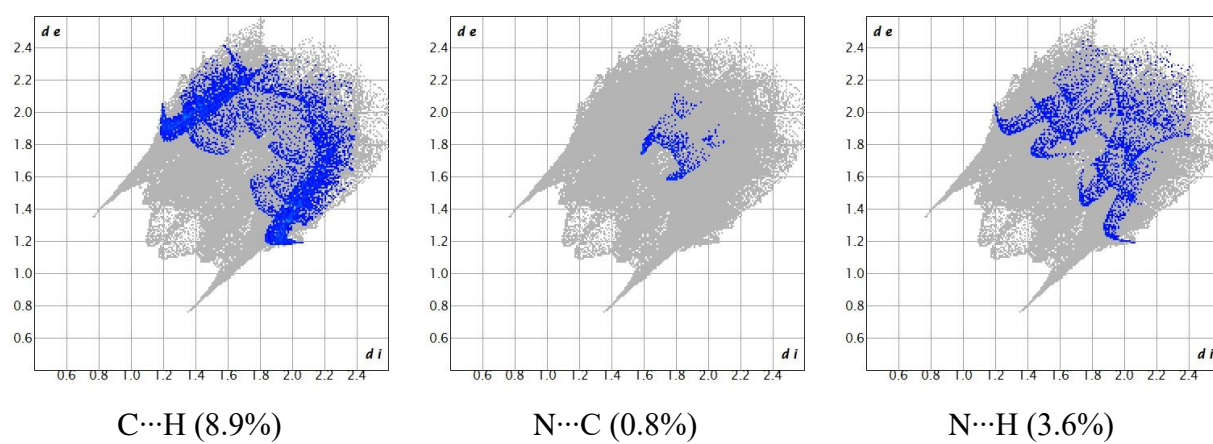

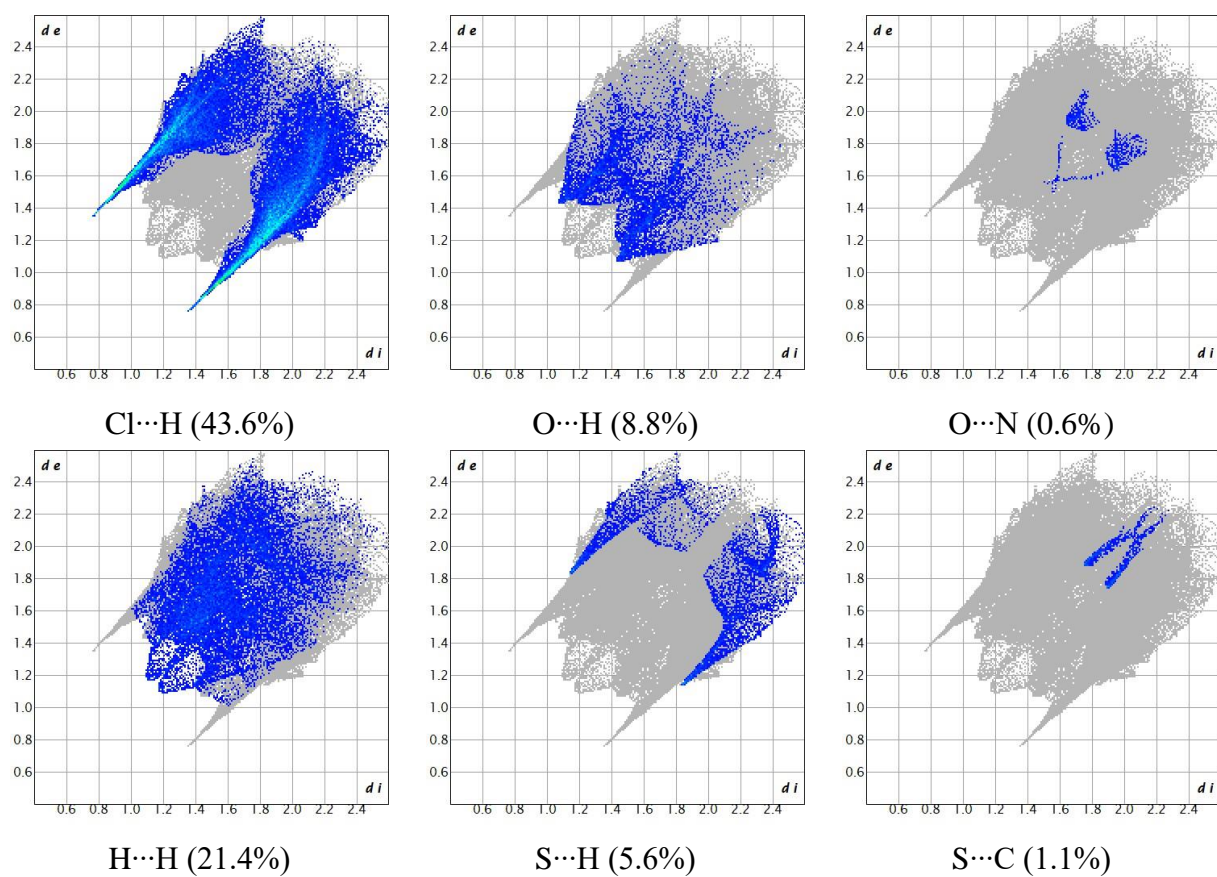

Figure S4. The fingerprint plots of the selected contacts within Co-PLTSC structure

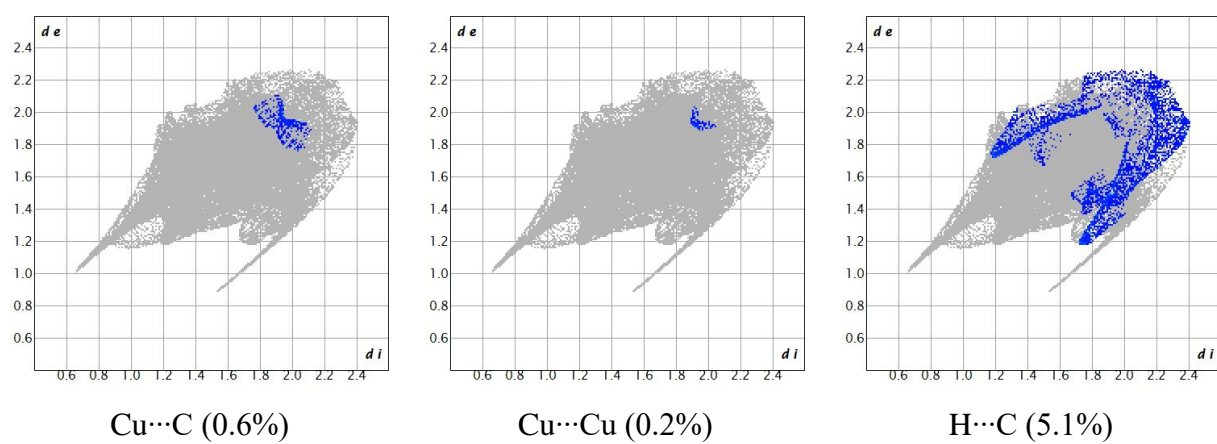



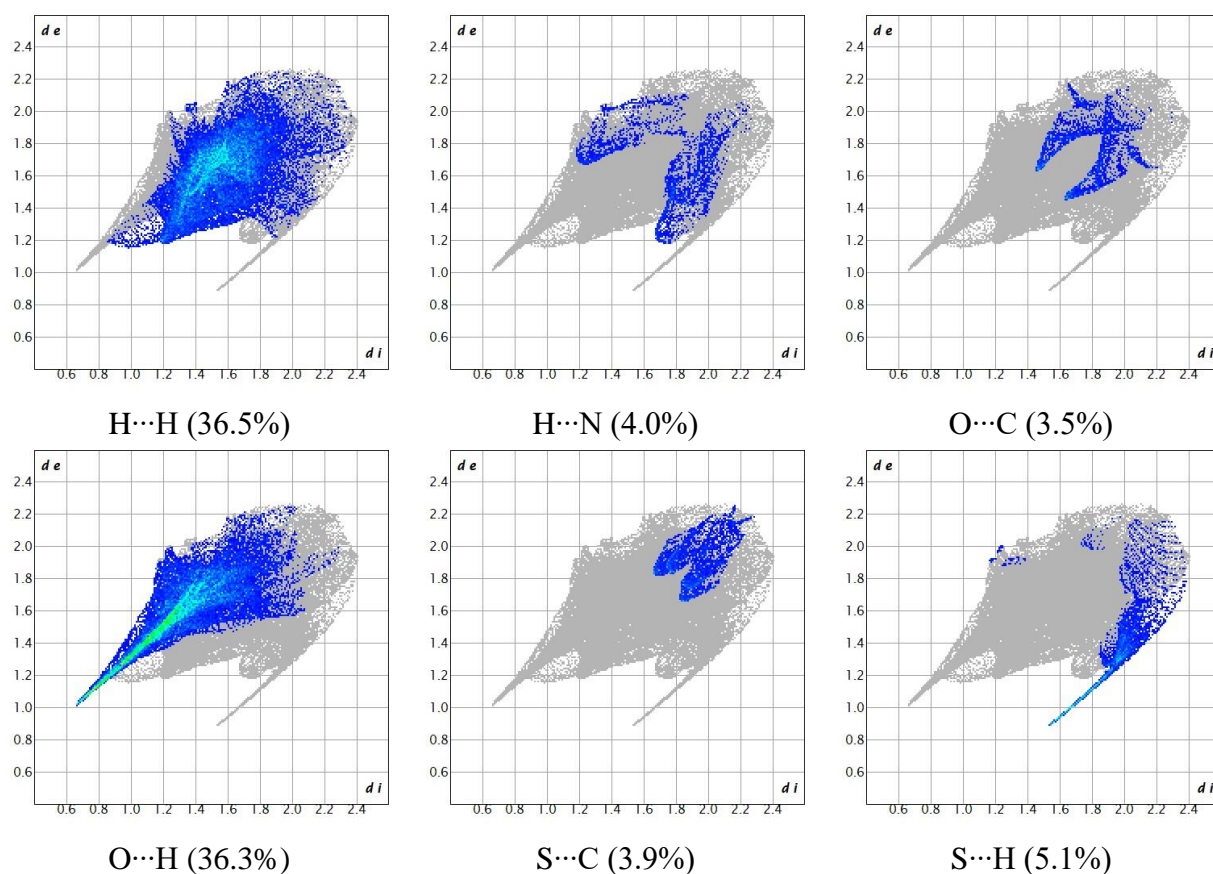

Figure S5. The fingerprint plots of the selected contacts within Co-PLTSC structure

Table S1. Crystallographic and optimized (at B3LYP/6-31+G(d,p) level of theory bond lengths (in Å) of PLTSC.

| Bond    | Optimized | Experimental |
|---------|-----------|--------------|
| O22-C6  | 1.34      | 1.34         |
| C6-C11  | 1.40      | 1.40         |
| C11-C12 | 1.49      | 1.49         |
| C11-N4  | 1.35      | 1.34         |
| C16-N4  | 1.36      | 1.34         |
| C16-C18 | 1.38      | 1.38         |
| C18-C3  | 1.42      | 1.42         |
| C3-C6   | 1.42      | 1.40         |
| C18-C24 | 1.52      | 1.51         |
| C24-O9  | 1.41      | 1.42         |
| C3-C28  | 1.45      | 1.46         |
| C28-N2  | 1.31      | 1.29         |
| N2-N7   | 1.33      | 1.37         |

|         |      |      |
|---------|------|------|
| N7-C27  | 1.40 | 1.35 |
| C27-S1  | 1.66 | 1.70 |
| C27-N19 | 1.35 | 1.31 |
| MAE     | 0.02 |      |

Table S2. Crystallographic and optimized (at B3LYP/6-31+G(d,p) level of theory) bond angles (in °) of PLTSC.

| Bond angle  | Optimized | Experimental |
|-------------|-----------|--------------|
| O22-C6-C3   | 123.2     | 124.0        |
| O22-C6-C11  | 115.9     | 115.3        |
| C6-C11-N4   | 117.1     | 116.9        |
| C6-C11-C12  | 122.7     | 123.1        |
| C12-C11-N4  | 120.2     | 120.0        |
| C11-N4-C16  | 124.7     | 124.9        |
| N4-C16-C18  | 119.9     | 120.5        |
| C16-C18-C24 | 118.7     | 118.1        |
| C16-C18-C3  | 119.1     | 120.1        |
| C18-C24-O9  | 108.1     | 111.9        |
| C24-C18-C3  | 122.2     | 121.8        |
| C18-C3-C6   | 118.2     | 118.8        |
| C18-C3-C28  | 120.4     | 119.1        |
| C6-C3-C28   | 121.4     | 122.1        |
| C3-C28-N2   | 121.2     | 121.4        |
| C28-N2-N7   | 119.0     | 114.8        |
| N2-N7-C27   | 124.3     | 122.2        |
| N7-C27-S1   | 118.0     | 117.5        |
| N7-C27-N19  | 115.8     | 119.3        |
| N19-C27-S1  | 126.2     | 123.3        |
| MAE         | 1.3       |              |

Table S3. Second order perturbation theory energies of stabilization interactions (at B3LYP/6-31+G(d,p) level of theory) within structure of PLTSC

| Stabilization interaction                                 | Energy [kJ mol <sup>-1</sup> ] |
|-----------------------------------------------------------|--------------------------------|
| $\pi(\text{S1-C27}) \rightarrow \pi(\text{N2-N7})$        | 19                             |
| $\pi(\text{C3-C28}) \rightarrow \pi(\text{C27-N19})$      | 17                             |
| $\pi(\text{N4-C11}) \rightarrow \pi(\text{C16-C18})$      | 76                             |
| $\pi(\text{C16-C18}) \rightarrow \pi(\text{N4-C11})$      | 60                             |
| $\text{LP}(\text{S1}) \rightarrow \sigma(\text{N7-C27})$  | 53                             |
| $\text{LP}(\text{S1}) \rightarrow \sigma(\text{N19-C27})$ | 49                             |
| $\text{LP}(\text{N2}) \rightarrow \sigma(\text{O22-H23})$ | 93                             |
| $\text{LP}(\text{N7}) \rightarrow \pi(\text{S1-C27})$     | 212                            |
| $\text{LP}(\text{N7}) \rightarrow \pi(\text{N2-C27})$     | 176                            |

|                                |     |
|--------------------------------|-----|
| LP(N19)→ $\pi$ (S1-C27)        | 274 |
| LP(O22)→ $\pi$ (C3-C6)         | 33  |
| $\pi$ (C6-C11)→ $\pi$ (C3-C28) | 11  |
| $\pi$ (C6-C18)→ $\pi$ (C3-C18) | 12  |

Table S4. Crystallographic and optimized (at B3LYP/6-31+G(d,p) level of theory bond lengths (in Å) of Fe-PLTSC.

|          | Optimized | Crystallographic |
|----------|-----------|------------------|
| fe1-Cl2  | 2.36      | 2.27             |
| fe1-Cl3  | 2.32      | 2.30             |
| fe1-S4   | 2.32      | 2.43             |
| fe1-N10  | 1.90      | 2.22             |
| fe1-O5   | 1.94      | 1.92             |
| s4-C12   | 1.68      | 1.70             |
| C12-N8   | 1.37      | 1.31             |
| C12-N9   | 1.35      | 1.34             |
| N9-N10   | 1.38      | 1.37             |
| N10-C13  | 1.31      | 1.30             |
| C13-C15  | 1.43      | 1.45             |
| C15-C16  | 1.45      | 1.41             |
| C16-O5   | 1.26      | 1.30             |
| C16C-C17 | 1.43      | 1.42             |
| C17-C18  | 1.49      | 1.48             |
| C18-N11  | 1.34      | 1.33             |
| N11-C22  | 1.36      | 1.37             |
| C22-C24  | 1.37      | 1.36             |
| C24-C25  | 1.51      | 1.51             |
| C25-O6   | 1.43      | 1.43             |
| C24-C15  | 1.42      | 1.42             |
| MAE      | 0.04      |                  |

Table S5. Crystallographic and optimized (at B3LYP/6-31+G(d,p) level of theory) selected bond angles (in °) of Fe-PLTSC.

|             | Optimized | Crystallographic |
|-------------|-----------|------------------|
| Cl2-Fe1-Cl3 | 98.5      | 97.7             |
| Cl2-Fe1-S4  | 91.4      | 92.0             |
| Cl2-Fe1-N10 | 173.6     | 168.5            |
| Cl2-Fe1-O5  | 89.1      | 104.2            |
| Cl2-Fe1-O7  | 79.5      | 87.0             |
| Fe1-S4-C12  | 94.8      | 99.5             |
| S4-C12-N8   | 123.8     | 120.5            |
| S4-C12-N9   | 120.4     | 122.1            |
| N8-C12-N9   | 115.7     | 117.4            |



|             |       |       |
|-------------|-------|-------|
| C12-N9-N10  | 120.8 | 122.0 |
| N9-N10-Fe1  | 116.8 | 116.6 |
| Fe1-N10-C13 | 128.3 | 128.3 |
| N10-C13-C15 | 124.2 | 123.4 |
| C13-C15-C16 | 121.2 | 121.8 |
| C13-C15-C24 | 119.8 | 118.7 |
| C15-C16-O5  | 126.0 | 125.1 |
| O5-C16-C17  | 116.3 | 116.4 |
| C16-C17-C18 | 120.4 | 122.5 |
| C18-C17-N11 | 120.3 | 118.6 |
| C17-N11-C22 | 124.3 | 123.9 |
| N11-C22-C24 | 119.7 | 119.5 |
| C22-C24-C15 | 120.0 | 119.4 |
| C22-C24-C25 | 117.3 | 117.5 |
| C24-C25-O   | 110.0 | 108.9 |
| MAE         | 2.1   |       |

Table S6. Crystallographic and optimized (at B3LYP/6-31+G(d,p) level of theory bond lengths (in Å) of Co-PLTSC.

|         | Optimized | Crystallographic |
|---------|-----------|------------------|
| Co1-S2  | 2.27      | 2.21             |
| Co1-S3  | 2.27      | 2.22             |
| S2-C21  | 1.74      | 1.74             |
| C21-N22 | 1.36      | 1.35             |
| C21-N16 | 1.33      | 1.32             |
| N16-N12 | 1.35      | 1.38             |
| Co-N12  | 1.94      | 1.91             |
| N12-C34 | 1.31      | 1.30             |
| C34-C33 | 1.44      | 1.44             |
| C33-C25 | 1.43      | 1.43             |
| C25-C45 | 1.51      | 1.51             |
| C45-O15 | 1.43      | 1.41             |
| C25-C31 | 1.38      | 1.36             |
| C31-N20 | 1.36      | 1.35             |
| N20-C36 | 1.35      | 1.34             |
| C36-C41 | 1.49      | 1.48             |
| C36-C29 | 1.43      | 1.41             |
| C29-O14 | 1.29      | 1.30             |
| O14-Co1 | 1.94      | 1.95             |
| S3-C30  | 1.74      | 1.74             |
| C30-N19 | 1.35      | 1.34             |
| C30-N17 | 1.33      | 1.32             |

|         |      |      |
|---------|------|------|
| N17-N11 | 1.35 | 1.38 |
| N11-Co1 | 1.94 | 1.91 |
| N11-C23 | 1.31 | 1.30 |
| C23-C6  | 1.44 | 1.45 |
| C6-C7   | 1.44 | 1.42 |
| C7-O13  | 1.29 | 1.31 |
| O13-Co1 | 1.95 | 1.97 |
| C7-C10  | 1.43 | 1.41 |
| C10-C37 | 1.49 | 1.49 |
| C10-N4  | 1.35 | 1.34 |
| N4-C8   | 1.36 | 1.34 |
| C8-C5   | 1.38 | 1.38 |
| C5-C26  | 1.52 | 1.51 |
| C26-O18 | 1.42 | 1.42 |
| MAE     | 0.01 |      |

Table S7. Crystallographic and optimized (at B3LYP/6-31+G(d,p) level of theory) selected bond angles (in °) of Co-PLTSC.

|             | Optimized | Crystallographic |
|-------------|-----------|------------------|
| S2-Co1-S3   | 92.1      | 92.9             |
| S2-Co1-N12  | 86.6      | 85.8             |
| S2-Co1-N11  | 91.4      | 94.5             |
| S2-Co1-O13  | 90.4      | 89.1             |
| S2-Co1-O14  | 177.8     | 177.5            |
| Co1-S2-C21  | 93.0      | 94.1             |
| S2-C21-N27  | 118.9     | 118.8            |
| S2-C21-N16  | 125.0     | 123.4            |
| N22-C21-N16 | 116.2     | 117.7            |
| C21-N16-N12 | 114.9     | 112.8            |
| N16-N12-Co1 | 120.5     | 120.6            |
| Co1-N12-C34 | 124.8     | 125.1            |
| N12-C34-C33 | 126.2     | 124.3            |
| C34-C33-C25 | 118.6     | 118.2            |
| C34-C33-C29 | 122.4     | 122.3            |
| C33-C25-C45 | 122.6     | 121.9            |
| C25-C45-C15 | 108.5     | 109.7            |
| C33-C25-C31 | 119.8     | 119.3            |
| C25-C31-N20 | 119.7     | 120.1            |
| C31-C20-C36 | 124.3     | 123.5            |
| C20-C36-C41 | 119.7     | 118.0            |
| C41-C36-C29 | 121.2     | 122.2            |
| C36-C29-O14 | 116.2     | 118.0            |

|             |       |       |
|-------------|-------|-------|
| C29-O14-Co1 | 125.8 | 121.1 |
| MAE         | 1.2   |       |

Table S8. Crystallographic and optimized (at B3LYP/6-31+G(d,p) level of theory bond lengths (in Å) of Ni-PLTSC.

|         | Optimized | Crystallographic |
|---------|-----------|------------------|
| Ni1-S1  | 2.48      | 2.43             |
| Ni1-S3  | 2.48      | 2.41             |
| S2-C26  | 1.69      | 1.69             |
| C26-N10 | 1.35      | 1.33             |
| C26-N13 | 1.37      | 1.35             |
| N13-N15 | 1.37      | 1.39             |
| N15-Ni1 | 2.10      | 2.04             |
| N15-C27 | 1.30      | 1.30             |
| C27-C29 | 1.45      | 1.45             |
| C29-C30 | 1.43      | 1.42             |
| C30-C39 | 1.52      | 1.51             |
| C39-O5  | 1.43      | 1.42             |
| C30-C31 | 1.38      | 1.37             |
| C31-N16 | 1.36      | 1.36             |
| N16-C33 | 1.34      | 1.34             |
| C33-C35 | 1.49      | 1.48             |
| C33-C34 | 1.45      | 1.44             |
| C34-O4  | 1.27      | 1.29             |
| O4-Ni1  | 2.05      | 2.05             |
| S23-C42 | 1.69      | 1.69             |
| C42-N18 | 1.35      | 1.32             |
| C42-N21 | 1.37      | 1.36             |
| N21-N23 | 1.37      | 1.37             |
| N23-C43 | 1.30      | 1.29             |
| C43-C45 | 1.45      | 1.46             |
| C45-C46 | 1.43      | 1.42             |
| C46-C55 | 1.52      | 1.51             |
| C55-O8  | 1.43      | 1.41             |
| C46-C47 | 1.38      | 1.37             |
| C47-N24 | 1.36      | 1.34             |
| N24-C49 | 1.34      | 1.34             |
| C49-C51 | 1.49      | 1.49             |
| C49-C50 | 1.45      | 1.43             |
| C50-O7  | 1.27      | 1.30             |
| O7-Ni1  | 2.05      | 2.04             |
| MAE     | 0.02      |                  |

Table S9. Crystallographic and optimized (at B3LYP/6-31+G(d,p) level of theory) selected bond angles (in °) of Ni-PLTSC.

|             | Optimized | Crystallographic |
|-------------|-----------|------------------|
| S2-Ni1-S3   | 93.0      | 92.5             |
| S2-Ni1-N15  | 82.7      | 82.1             |
| S2-Ni1-N23  | 95.8      | 102.8            |
| S2-Ni-O4    | 169.7     | 168.4            |
| S2-Ni1-O7   | 90.2      | 88.8             |
| Ni1-S2-C26  | 95.2      | 94.5             |
| S2-C26-N10  | 121.6     | 122.7            |
| S2-C26-N13  | 123.2     | 122.0            |
| N10-C26-N13 | 115.1     | 115.2            |
| C26-N13-N15 | 122.5     | 119.8            |
| N13-N15-Ni1 | 116.3     | 115.5            |
| N13-N15-C27 | 115.9     | 114.9            |
| N15-C27-C29 | 125.8     | 122.2            |
| C27-C29-C34 | 122.4     | 122.0            |
| C27-C29-C30 | 117.7     | 117.6            |
| C29-C34-O4  | 126.3     | 125.5            |
| C34-O4-Ni1  | 129.9     | 121.9            |
| O4-C34-C33  | 116.6     | 117.6            |
| C34-C33-C35 | 121.0     | 122.3            |
| C34-C33-N16 | 119.0     | 118.9            |
| C33-N16-C31 | 125.0     | 124.7            |
| N16-C31-C30 | 119.5     | 119.6            |
| C31-C30-C39 | 117.0     | 118.4            |
| C30-C39-O5  | 109.4     | 112.0            |
| C39-C30-C29 | 123.4     | 122.6            |
| MAE         | 1.6       |                  |

Table S10. Crystallographic and optimized (at B3LYP/6-31+G(d,p) level of theory bond lengths (in Å) of Cu-PLTSC.

|         | Optimized | Crystallographic |
|---------|-----------|------------------|
| Cu1-S2  | 2.34      | 2.27             |
| Cu1-O3  | 2.12      | 1.89             |
| Cu1-N14 | 2.15      | 1.98             |
| Cu1-O35 | 2.20      | 2.34             |
| S2-C17  | 1.69      | 1.71             |
| C17-N9  | 1.35      | 1.32             |
| C17-N12 | 1.37      | 1.34             |
| N12-N14 | 1.36      | 1.38             |

|         |      |      |
|---------|------|------|
| N14-C18 | 1.29 | 1.29 |
| C18-C20 | 1.46 | 1.45 |
| C20-C21 | 1.45 | 1.42 |
| C21-O3  | 1.28 | 1.30 |
| C21-C22 | 1.44 | 1.42 |
| C22-C23 | 1.49 | 1.48 |
| C22-N15 | 1.34 | 1.33 |
| N15-C27 | 1.36 | 1.35 |
| C27-C29 | 1.38 | 1.36 |
| C29-C30 | 1.52 | 1.51 |
| C29-C20 | 1.42 | 1.42 |
| C30-O4  | 1.43 | 1.43 |
| MAE     | 0.04 |      |

Table S11. Crystallographic and optimized (at B3LYP/6-31+G(d,p) level of theory) selected bond angles (in °) of Cu-PLTSC.

|             | Optimized | Crystallographic |
|-------------|-----------|------------------|
| S2-Cu1-O3   | 150.4     | 172.2            |
| S2-Cu1-N14  | 84.7      | 86.4             |
| S2-Cu1-O36  | 116.1     | 101.0            |
| S2-C17-N9   | 121.2     | 121.6            |
| S2-C17-N12  | 123.9     | 121.3            |
| N9-C17-N12  | 114.9     | 117.1            |
| C17-N12-N14 | 120.7     | 119.3            |
| N12-N14-Cu  | 113.8     | 116.7            |
| N12-N14-C18 | 118.4     | 115.7            |
| N14-C18-C20 | 123.7     | 123.5            |
| C18-C20-C21 | 122.7     | 122.1            |
| C18-C20-C29 | 117.5     | 118.8            |
| C20-C29-C30 | 121.6     | 122.5            |
| C29-C30-O4  | 107.8     | 108.6            |
| C30-C29-C27 | 118.5     | 118.1            |
| C29-C27-N15 | 118.9     | 120.4            |
| C27-C15-C22 | 125.0     | 123.6            |
| C15-C22-C23 | 119.2     | 119.7            |
| C15-C22-C21 | 119.2     | 119.5            |
| C22-C21-O3  | 117.8     | 116.2            |
| C21-O3-Cu   | 127.2     | 127.3            |
| MAE         | 2.9       |                  |

Table S12. Second order perturbation theory energies of selected stabilization interactions (at B3LYP/6-31+G(d,p) level of theory) within structures of investigated complexes

| Compound | Stabilization interaction | Energy [kJ mol <sup>-1</sup> ] |
|----------|---------------------------|--------------------------------|
| Fe-PLTSC | LP(O)→σ(Fe-Cl)            | 51                             |
|          | LP(Owater)→LP*(Fe)        | 355                            |
|          | π(C-S)→LP*(Fe)            | 18                             |
|          | π(C-N)→LP*(Fe)            | 22                             |
| Co-PLTSC | LP(S)→σ(O-S)              | 44                             |
|          | LP(O)→σ(Co-O)             | 25                             |
|          | σ(Co-N)→σ(Co-N)           | 29                             |
| Ni-PLTSC | LP(S)→σ(Ni-S)             | 42                             |
|          | LP(O)→σ(Ni-S)             | 142                            |
|          | LP(N)→LP(Ni)              | 117                            |
| Cu-PLTSC | LP(S)→LP(Cu)              | 87                             |
|          | LP(O)→LP(Cu)              | 107                            |
|          | LP(N)→LP(Cu)              | 43                             |
|          | LP(O)→LP(Cu2)             | 100                            |

Table S13. Binding constant ( $K_b$ ), the number of binding sites ( $n$ ) for the competitive measurements with warfarin

| Compound | $K_b$ [M <sup>-1</sup> ] | $n$  | R     |
|----------|--------------------------|------|-------|
| Fe-PLTSC | $2.00 \times 10^5$       | 1.10 | 0.994 |
| Co-PLTSC | $5.25 \times 10^4$       | 1.01 | 0.983 |
| Ni-PLTSC | $6.03 \times 10^6$       | 1.30 | 0.995 |
| Cu-PLTSC | $3.39 \times 10^6$       | 1.20 | 0.992 |

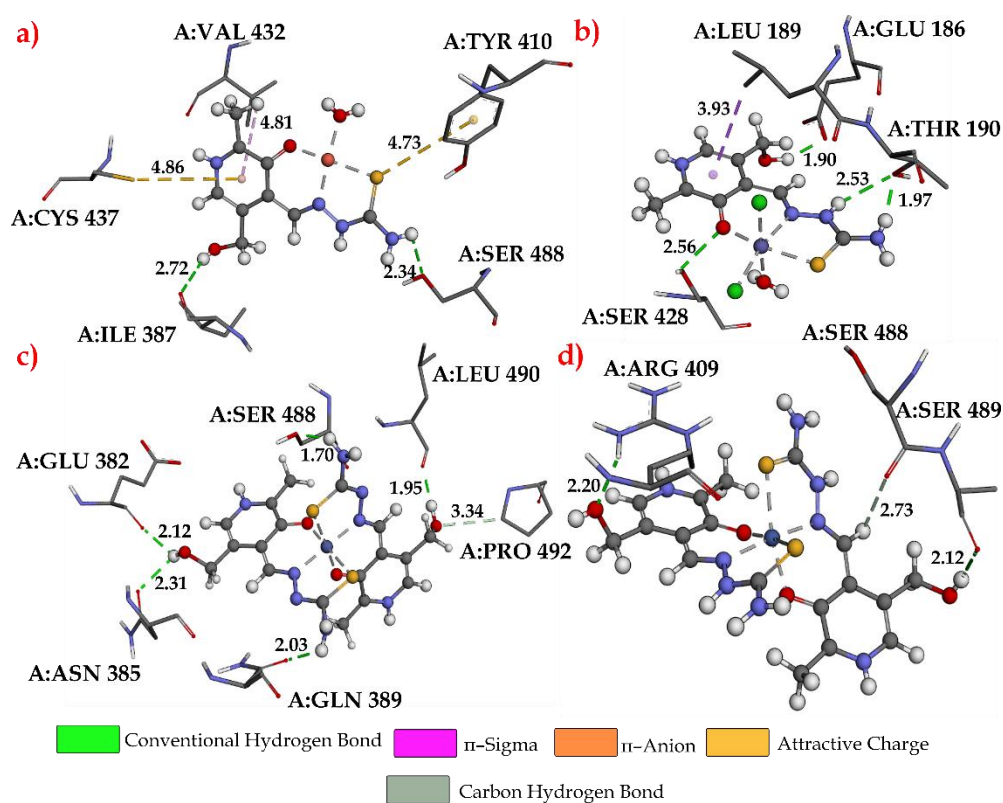



Figure S6. The most stable conformations of investigated complexes in structure of BSA (active pocket IIIA) a) Cu-PLTSC, b) Fe-PLTSC, c) Co-PLTSC, and d) Ni-PLTSC

Table S14. Important thermodynamic parameters ( $\Delta G_{\text{bind}}$  free energy binding,  $K_i$  constant of inhibition,  $\Delta G_{\text{total}}$  final total internal energy,  $\Delta G_{\text{tor}}$  torsional free energy,  $\Delta G_{\text{unb}}$  unbound system's energy,  $\Delta G_{\text{elec}}$  electrostatic energy and  $\Delta G_{\text{vdw+hbond+desolv}}$  is the sum of dispersion and repulsion ( $\Delta G_{\text{vdw}}$ ), hydrogen bond ( $\Delta G_{\text{hbond}}$ ), and desolvation ( $\Delta G_{\text{desolv}}$ ) energy predicted for most stable docking conformations.

| Conformations          | $\Delta G_{\text{bind}}$ | $K_i$<br>( $\mu\text{M}$ ) | $\Delta G_{\text{inter}}$ | $\Delta G_{\text{vdw+hbond+desolv}}$ | $\Delta G_{\text{elec}}$ | $\Delta G_{\text{total}}$ | $\Delta G_{\text{tor}}$ | $\Delta G_{\text{unb}}$ |
|------------------------|--------------------------|----------------------------|---------------------------|--------------------------------------|--------------------------|---------------------------|-------------------------|-------------------------|
| <b>HSA-Cu-PLTSC-I</b>  | -23.4                    | 78.2                       | -28.0                     | -27.1                                | -0.9                     | -2.2                      | 4.6                     | -2.2                    |
| <b>HSA-Cu-PLTSC-II</b> | -23.5                    | 360.7                      | -24.2                     | -23.7                                | -0.5                     | -2.2                      | 4.6                     | -2.2                    |
| <b>HSA-Fe-PLTSC-I</b>  | -23.3                    | 160.4                      | -26.2                     | -25.9                                | -0.3                     | -1.8                      | 4.6                     | -1.8                    |
| <b>HSA-Fe-PLTSC-II</b> | -21.2                    | 0.2                        | -20.0                     | -19.2                                | -0.8                     | -1.8                      | 4.6                     | -1.8                    |
| <b>HSA-Co-PLTSC-I</b>  | -24.0                    | 60.6                       | -30.9                     | -27.8                                | -3.1                     | 0.9                       | 6.9                     | 0.9                     |
| <b>HSA-Co-PLTSC-II</b> | -13.7                    | 0.4                        | -20.6                     | -19.2                                | -1.4                     | 1.1                       | 6.9                     | 1.1                     |
| <b>HSA-Ni-PLTSC-I</b>  | -19.1                    | 438.9                      | -23.7                     | -22.2                                | -1.5                     | 0.3                       | 4.6                     | 0.3                     |
| <b>HSA-Ni-PLTSC-II</b> | -13.1                    | 0.5                        | -17.6                     | -16.8                                | -0.8                     | 0.1                       | 4.6                     | 0.1                     |

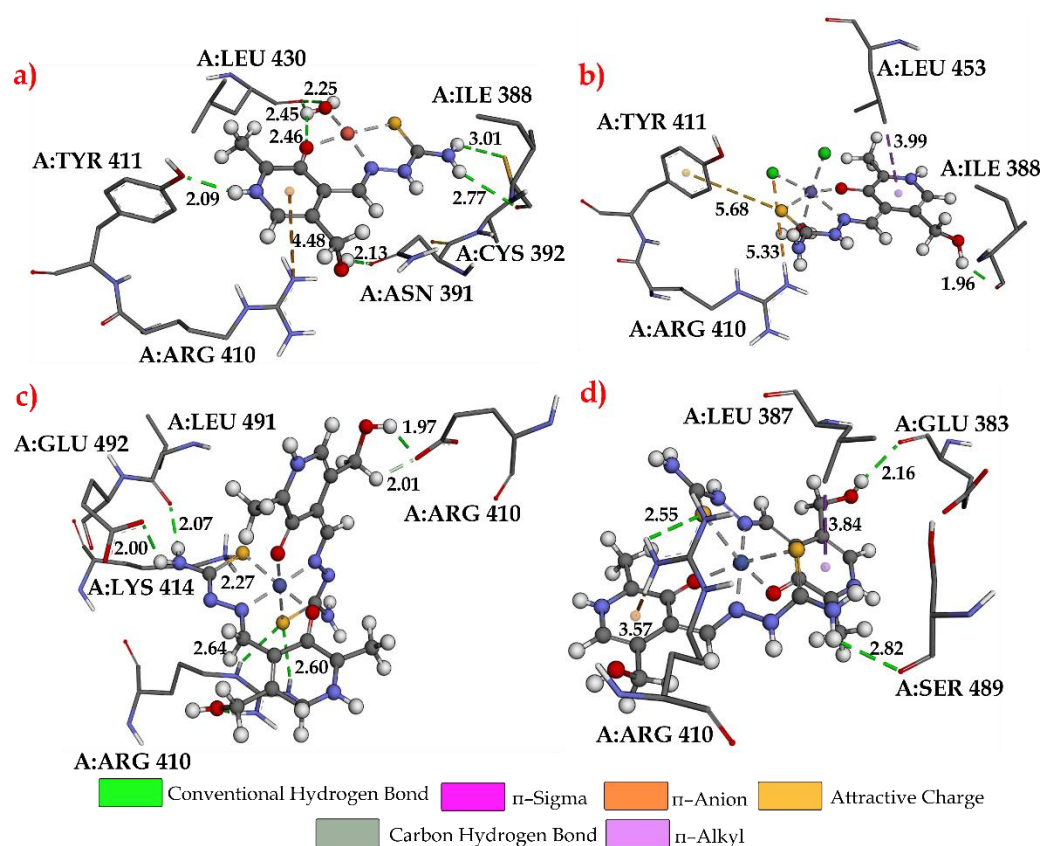

Figure S7. The most stable conformations of investigated complexes in structure of HSA (active pocket IIIA) a) Cu-PLTSC, b) Fe-PLTSC, c) Co-PLTSC, and d) Ni-PLTSC

Table S15. Important thermodynamic parameters ( $\Delta G_{\text{bind}}$  free energy binding,  $K_i$  constant of inhibition,  $\Delta G_{\text{total}}$  final total internal energy,  $\Delta G_{\text{tor}}$  torsional free energy,  $\Delta G_{\text{unb}}$  unbound system's energy,  $\Delta G_{\text{elec}}$  electrostatic energy and  $\Delta G_{\text{vdw+hbond+desolv}}$  is the sum of dispersion and repulsion ( $\Delta G_{\text{vdw}}$ ), hydrogen bond ( $\Delta G_{\text{hbond}}$ ), and desolvation ( $\Delta G_{\text{desolv}}$ ) energy predicted for most stable docking conformations.

| Conformations                | $\Delta G_{\text{bind}}$ | $K_i$<br>( $\mu\text{M}$ ) | $\Delta G_{\text{inter}}$ | $\Delta G_{\text{vdw+hbond+desolv}}$ | $\Delta G_{\text{elec}}$ | $\Delta G_{\text{total}}$ | $\Delta G_{\text{tor}}$ | $\Delta G_{\text{unb}}$ |
|------------------------------|--------------------------|----------------------------|---------------------------|--------------------------------------|--------------------------|---------------------------|-------------------------|-------------------------|
| <b>DNA-Cu-PLTSC-6 base</b>   | -29.3                    | 7.22                       | -33.9                     | -33.2                                | -0.7                     | -2.2                      | 4.6                     | -2.2                    |
| <b>DNA-Cu-PLTSC- 10 base</b> | -31.9                    | 2.50                       | -36.5                     | -35.9                                | -0.6                     | -2.0                      | 4.6                     | -2.0                    |
| <b>DNA-Fe-PLTSC-6 base</b>   | -24.0                    | 63.6                       | -28.5                     | -27.9                                | -0.6                     | -1.2                      | 4.6                     | -1.2                    |
| <b>DNA-Fe-PLTSC- 10 base</b> | -26.9                    | 19.3                       | -31.5                     | -30.4                                | -1.1                     | -1.6                      | 4.6                     | -1.6                    |
| <b>DNA-Co-PLTSC- 6 base</b>  | -23.3                    | 81.5                       | -30.2                     | -30.1                                | -0.2                     | 0.9                       | 6.9                     | 0.9                     |
| <b>DNA-Co-PLTSC- 10 base</b> | -26.0                    | 27.3                       | -32.9                     | -31.9                                | -1.0                     | 1.0                       | 6.9                     | 1.0                     |
| <b>DNA-Ni-PLTSC- 6 base</b>  | -25.9                    | 29.0                       | -30.5                     | -29.5                                | -1.0                     | 0.3                       | 4.6                     | 0.3                     |
| <b>DNA-Ni-PLTSC-10 base</b>  | -26.5                    | 22.6                       | -31.1                     | -28.6                                | -2.4                     | 0.1                       | 4.6                     | 0.1                     |

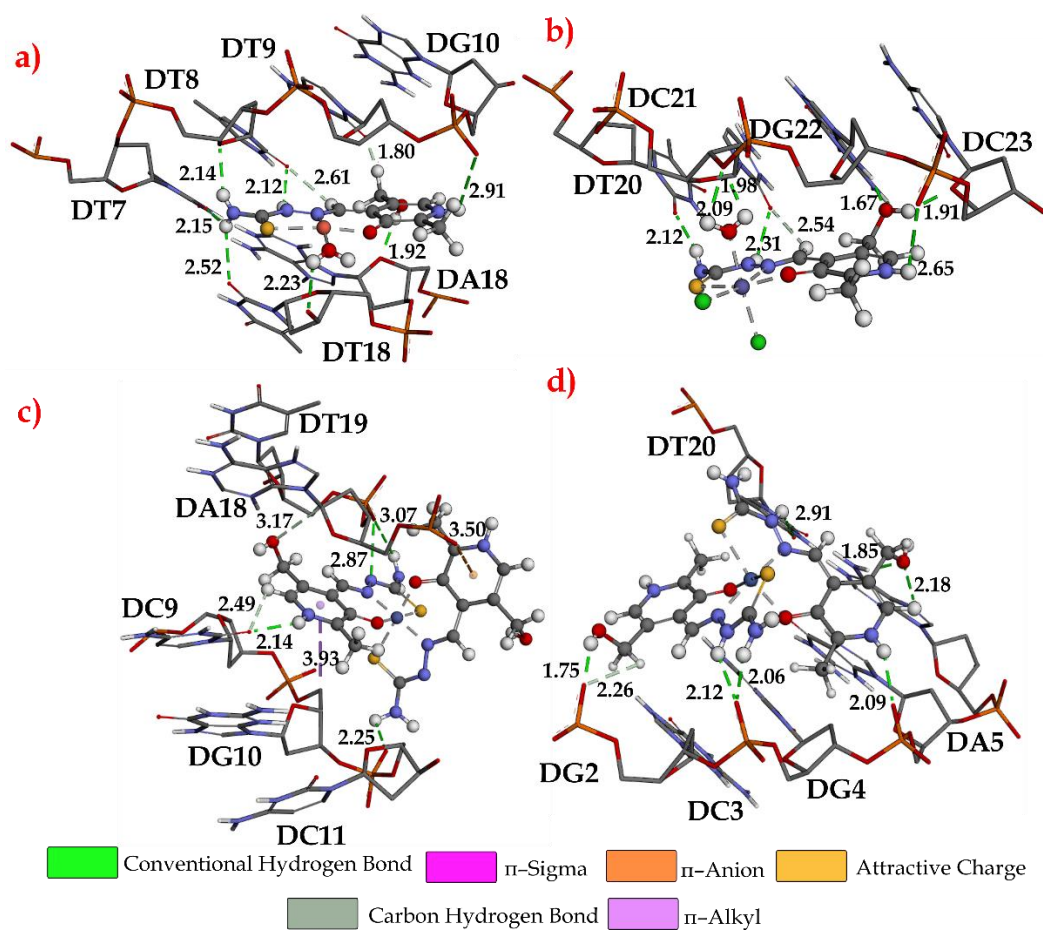

Figure S8. The interactions formed between investigated complexes and ten-base DNA for the most stable conformers: a) Cu-PLTSC, b) Fe-PLTSC, c) Co-PLTSC, and d) Ni-PLTSC.

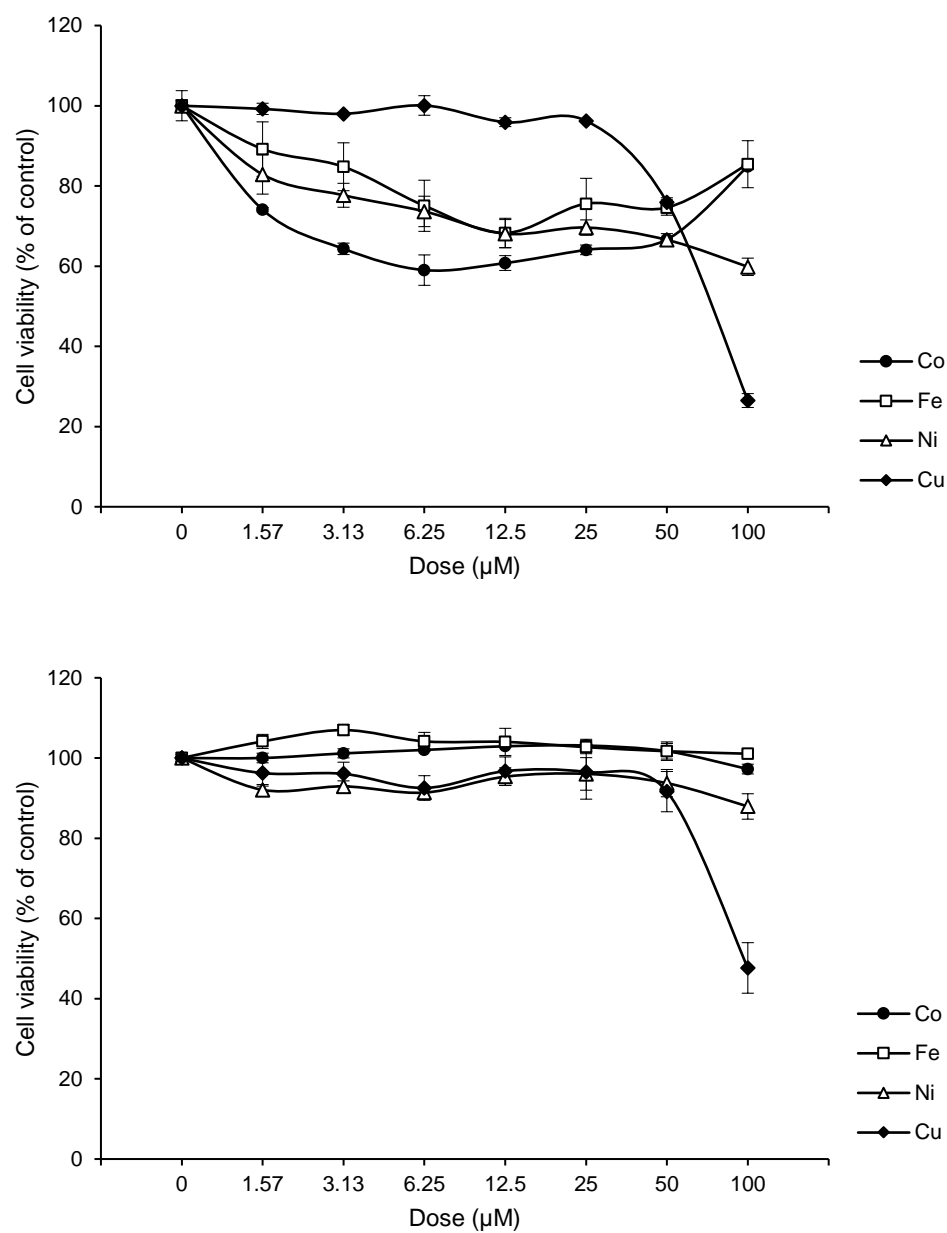

Figure S9. The dose-response curve for the activity towards A375 measured by MTT (upper) and CV (lower) tests.

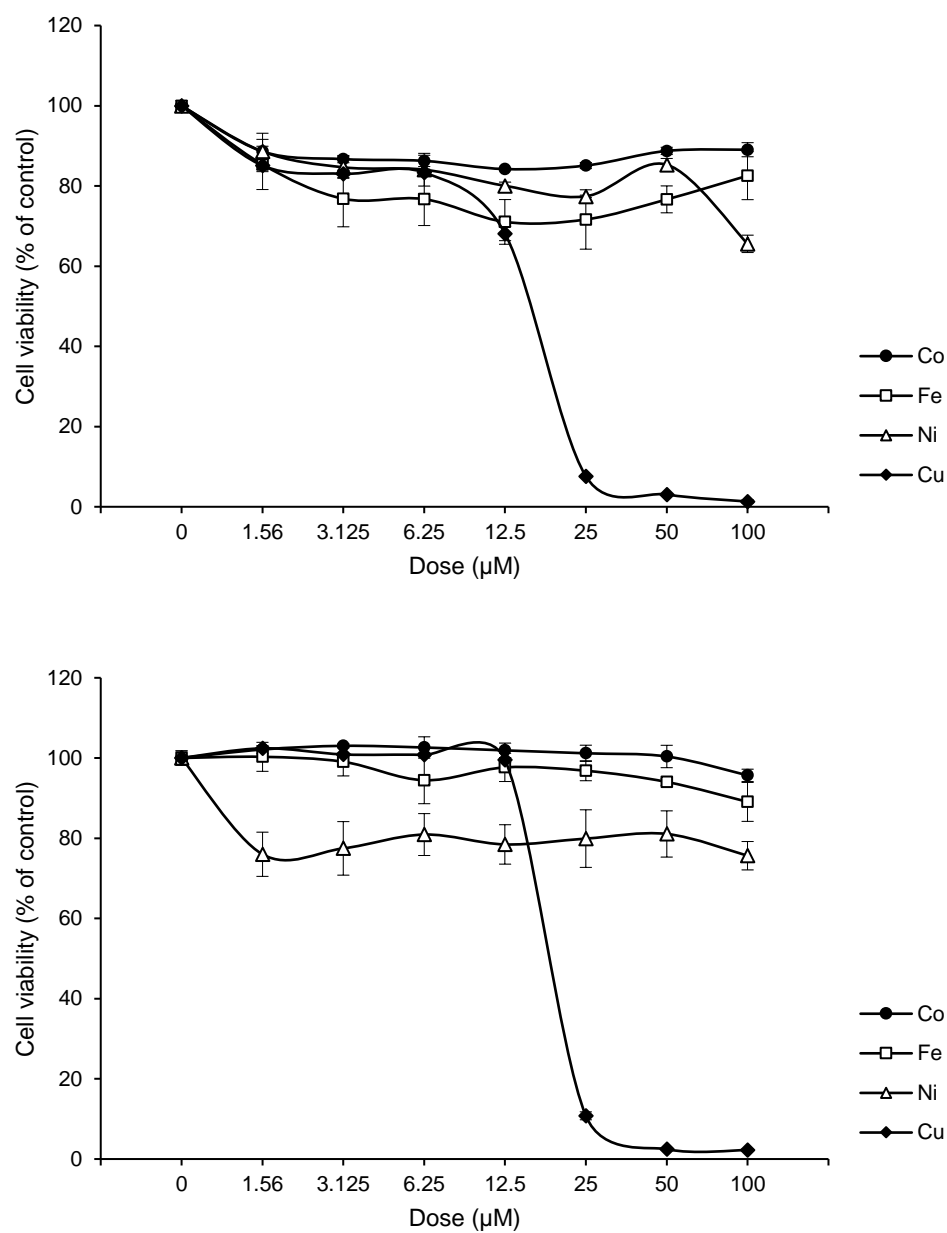

Figure S10. The dose-response curve for the activity towards HCT 116 measured by MTT (upper) and CV (lower) tests.

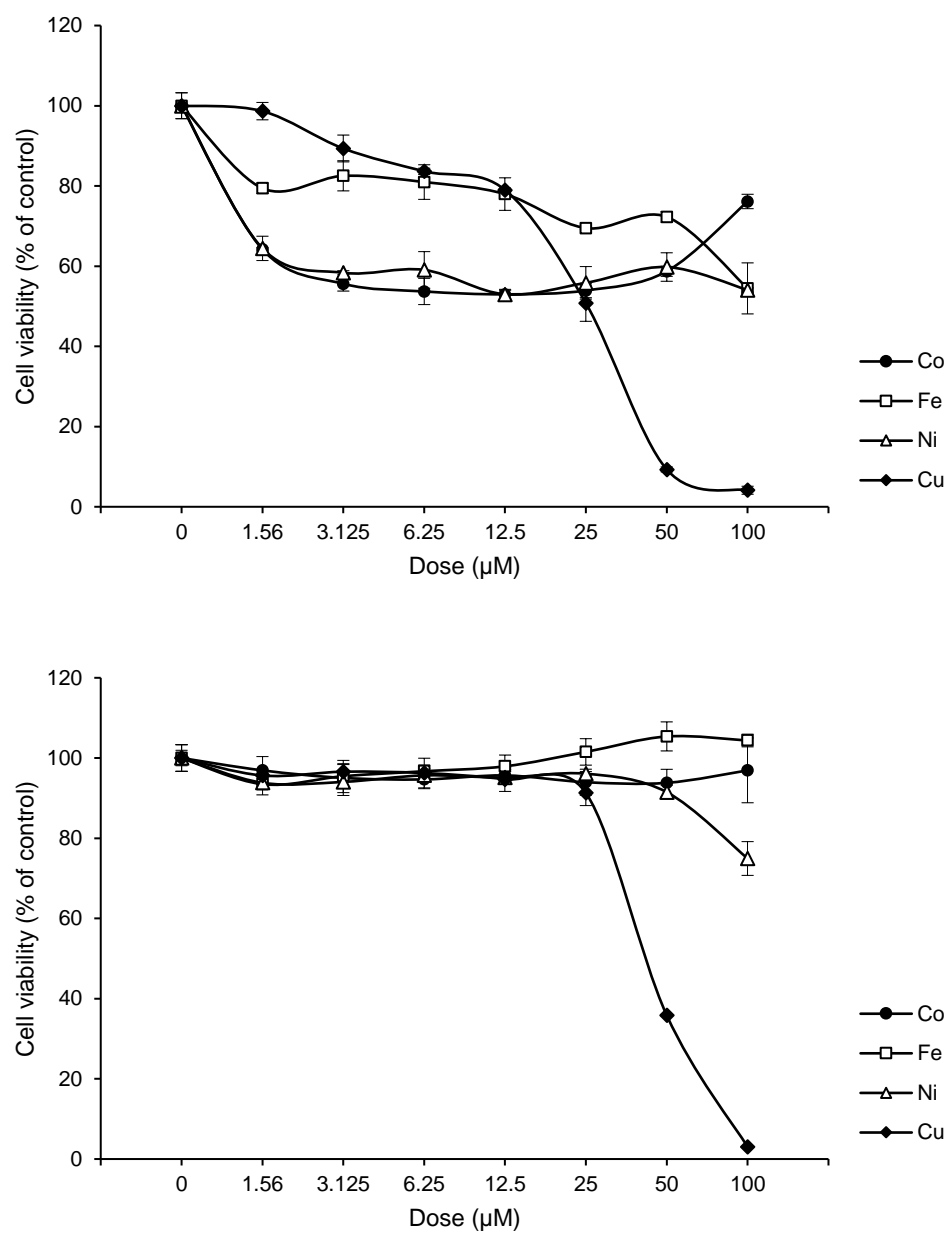

Figure S11. The dose-response curve for the activity towards MCF-7 measured by MTT (upper) and CV (lower) tests.



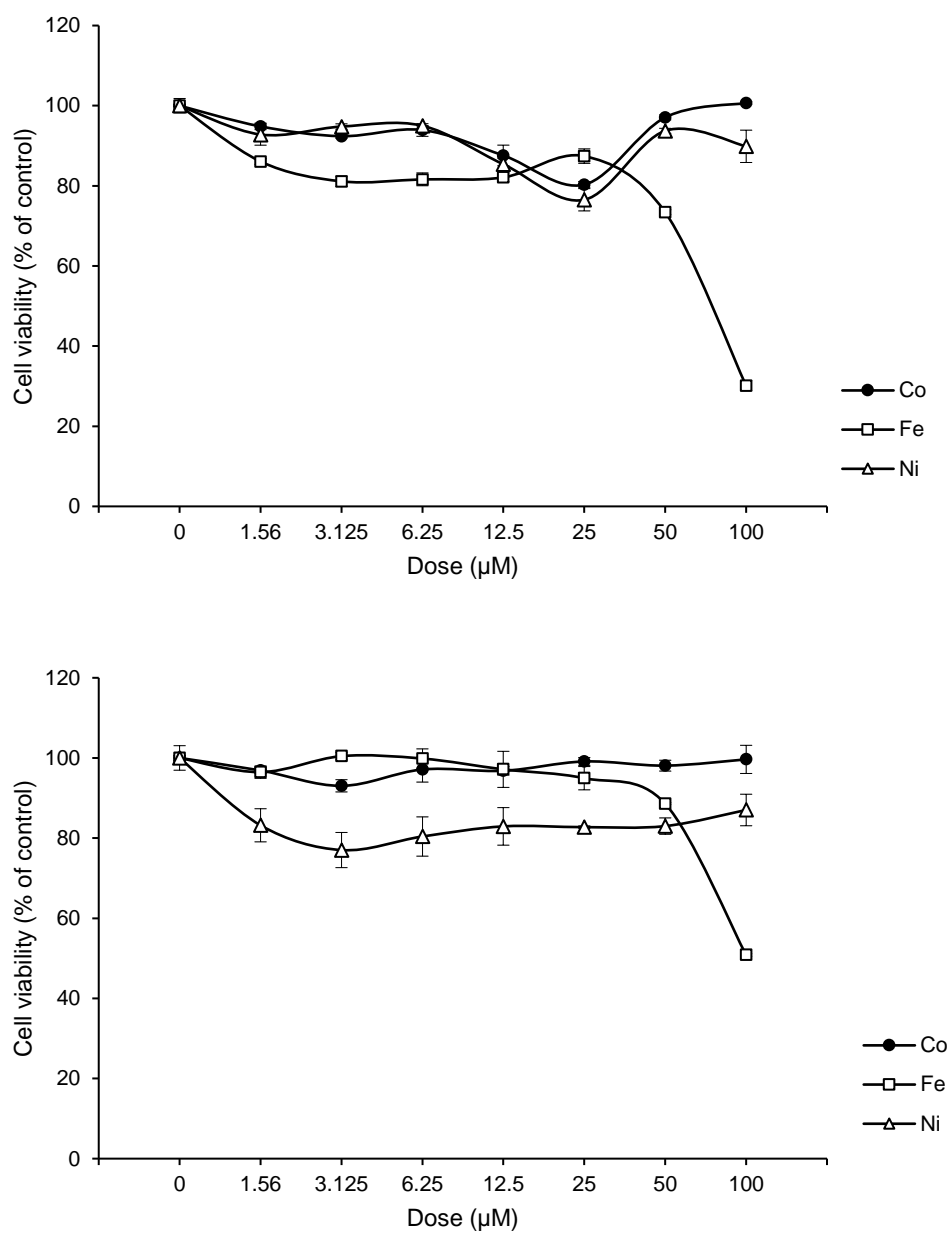

Figure S12. The dose-response curve for the activity of Fe-PLTSC, Co-PLTSC, and Ni-PLTSC towards A2780 measured by MTT (upper) and CV (lower) tests.

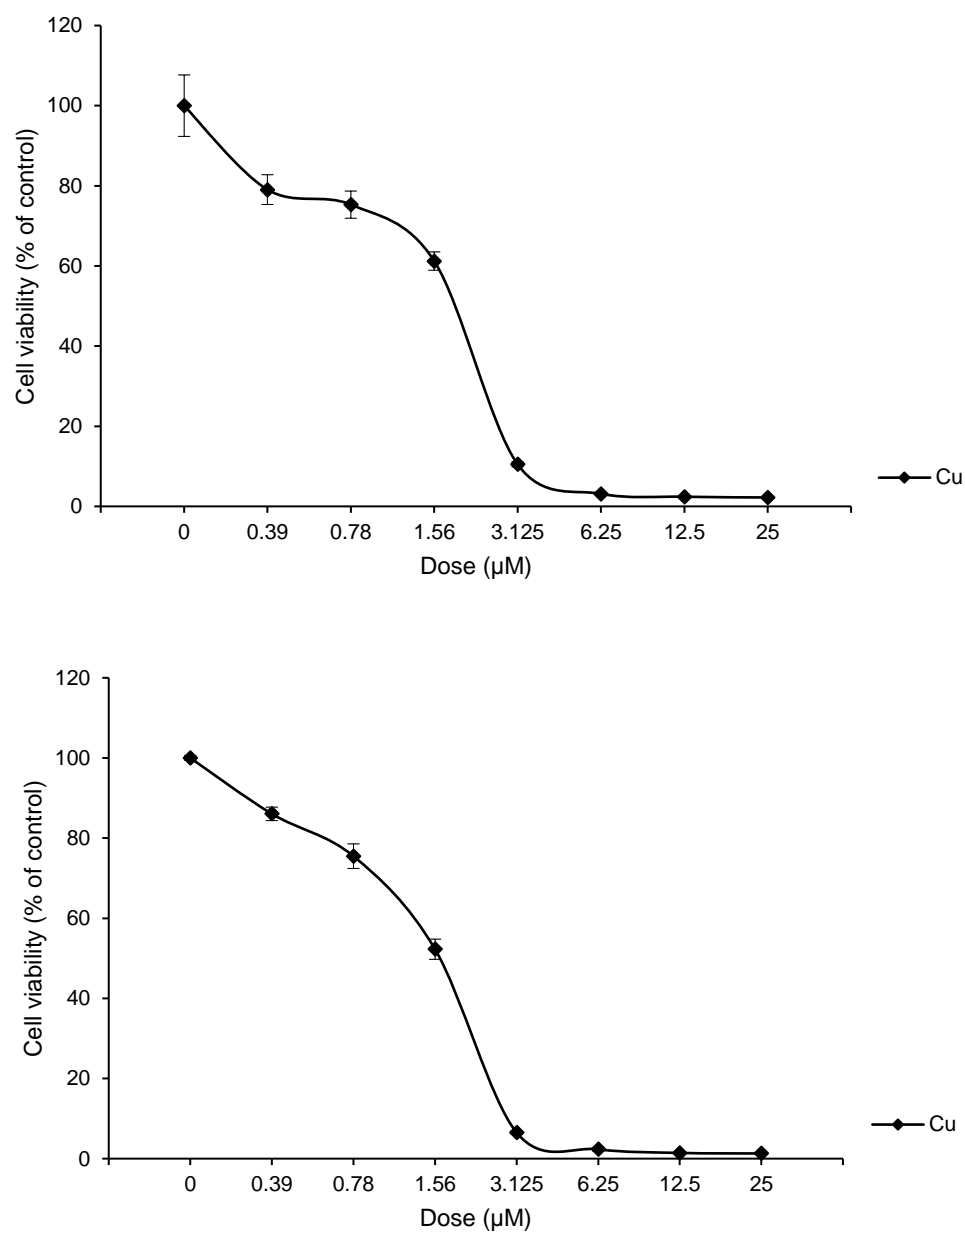

Figure S13. The dose-response curve for the activity of Cu-PLTSC towards A2780 measured by MTT (upper) and CV (lower) tests.

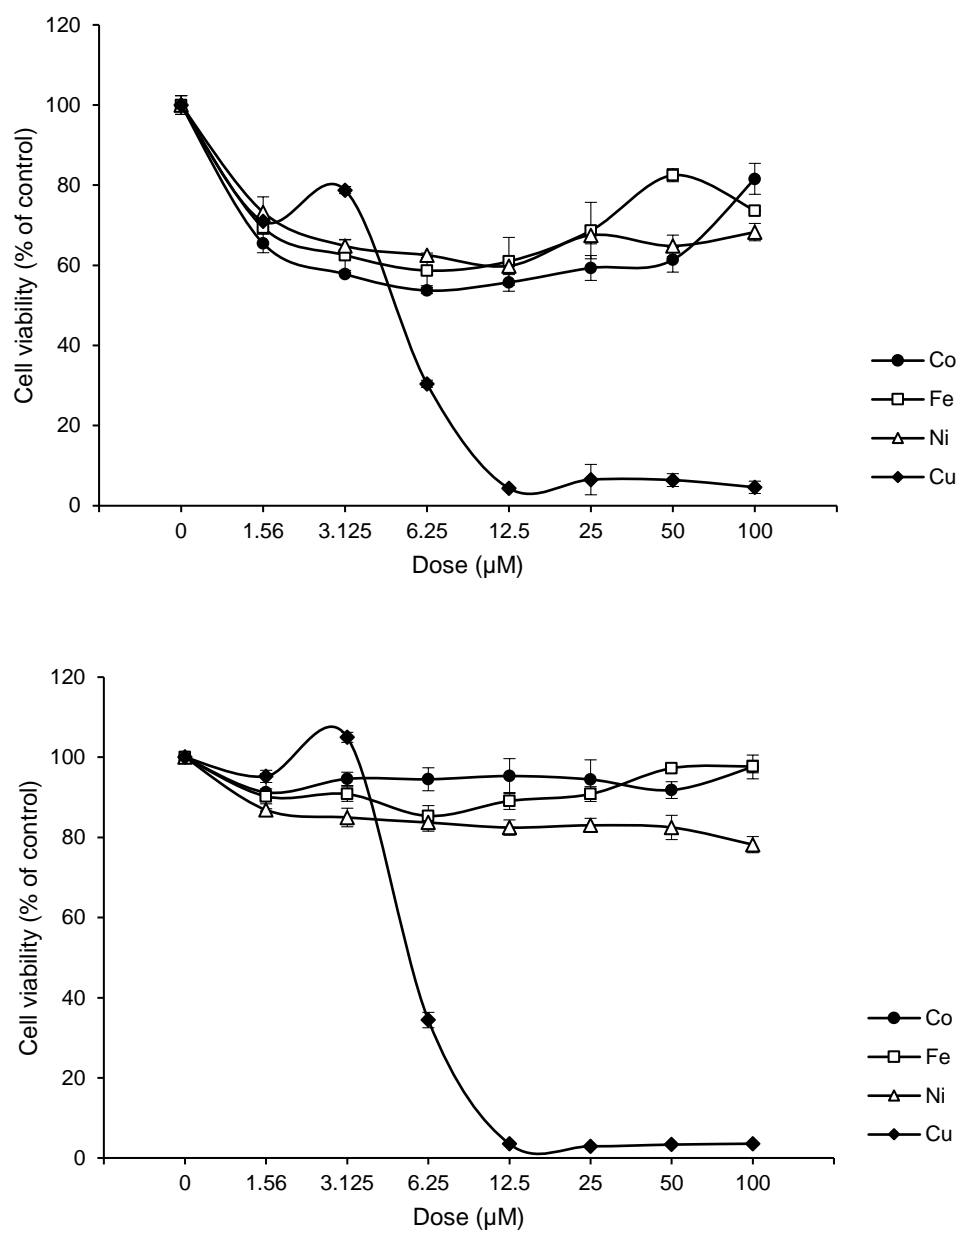

Figure S14. The dose-response curve for the activity towards MRC5 measured by MTT (upper) and CV (lower) tests.
